# Supplementary material
Source: Springer Nature journal article supplement (https://www.springermedizin.de/resource/supplementary/13075_2009_2737_MOESM7_ESM.pdf/9692774)

**(a)**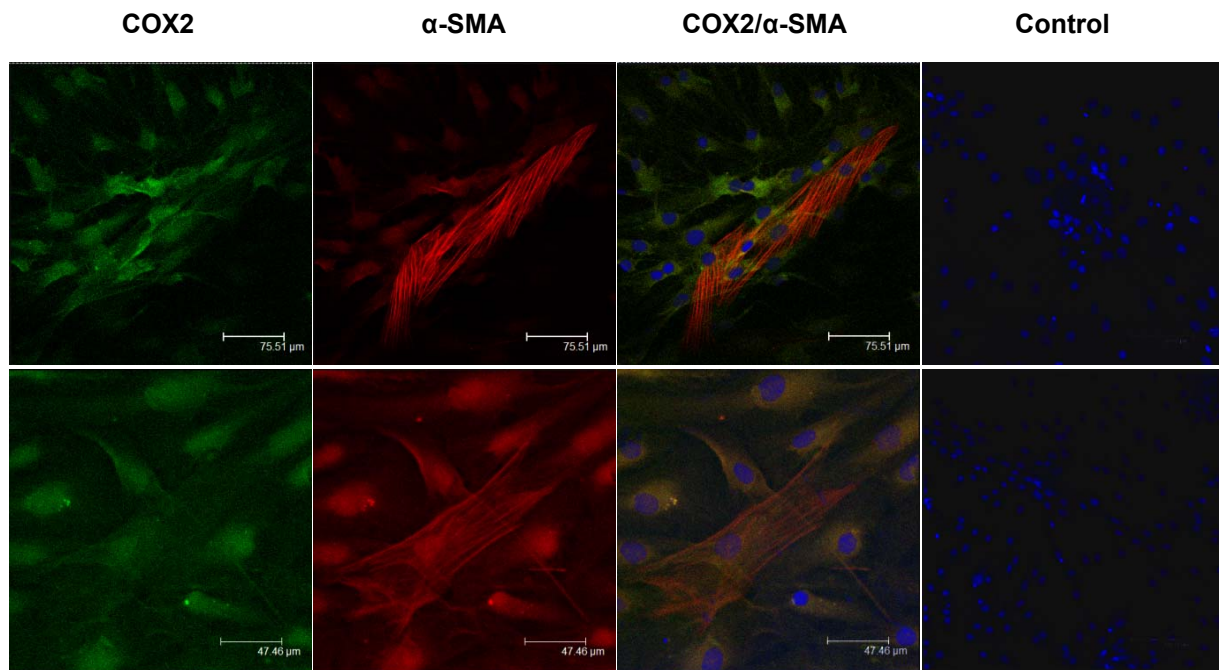**(b)**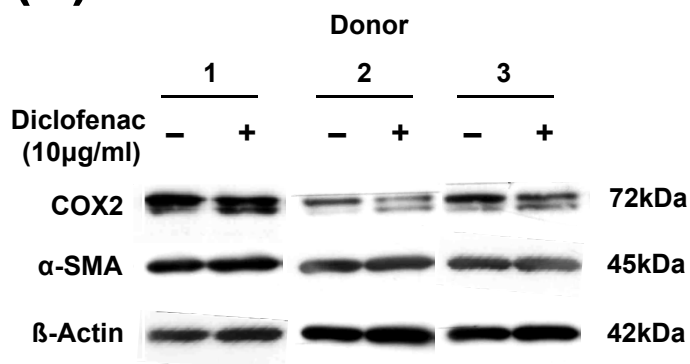**(c)**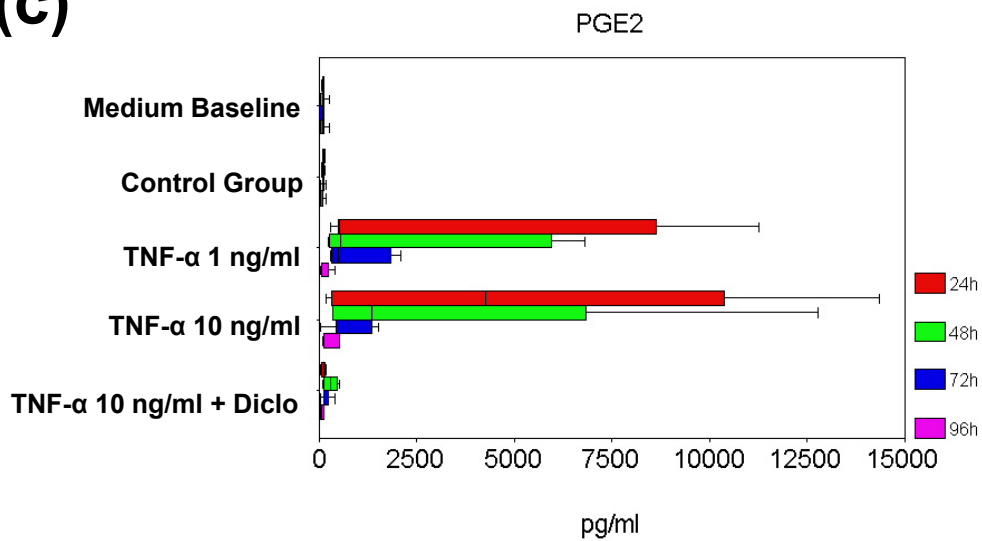

Supplement: MOESM7 [file 9692774]
